# Supplementary material
Source: Springer Nature journal article supplement (https://www.springermedizin.de/resource/supplementary/12876_2013_1086_MOESM5_ESM.pdf/9438456)

NC

Mock

VSV-G LV(1)

VSV-G LV(2)

Day 10

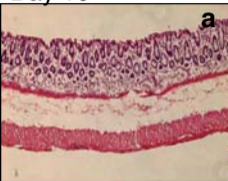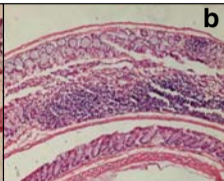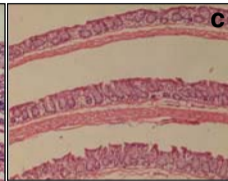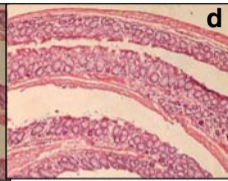

Day 32

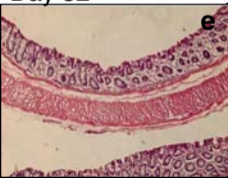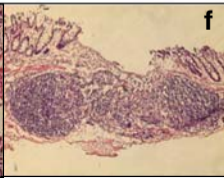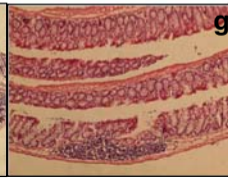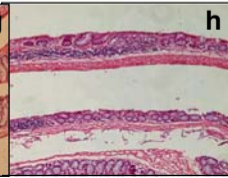

Supplement: MOESM5 [file 9438456]
